# Supplementary figures and images for: Randomized controlled trial transfusing convalescent plasma as post-exposure prophylaxis against SARS-CoV-2 infection
Source: PubMed Central journal article supplement — medRxiv. 2021 Dec 14:2021.12.13.21267611. Preprint. [Version 1] doi: 10.1101/2021.12.13.21267611 (PMC8687473; doi:10.1101/2021.12.13.21267611), 2021-12-14

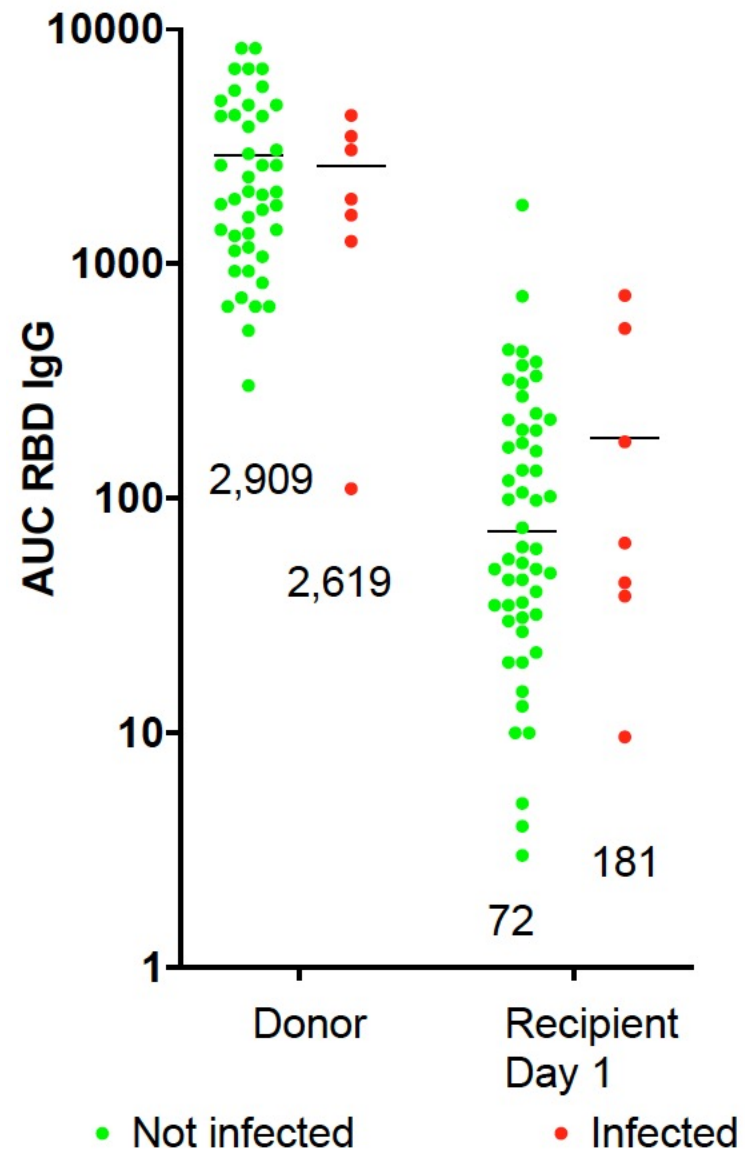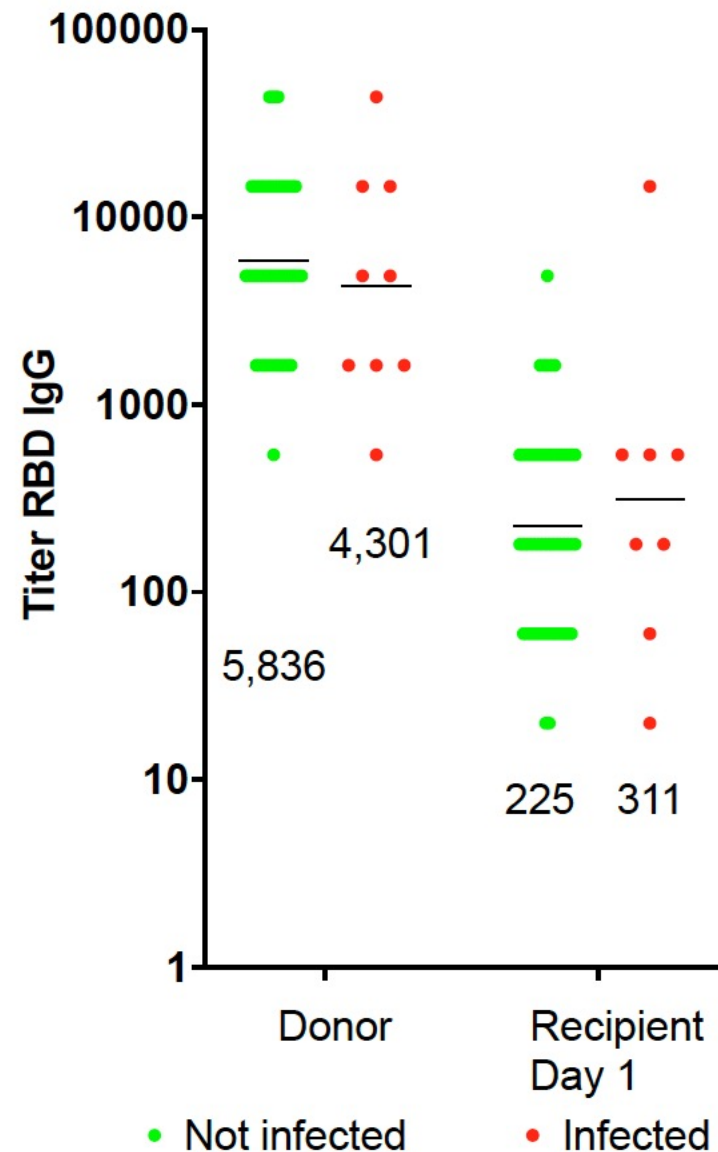

Supplement: NIHPP2021.12.13.21267611V1-supplement-1.pdf [file NIHPP2021.12.13.21267611V1-supplement-1.pdf]
